# Supplementary material for: Cost of care for Alzheimer’s disease and related dementias in the United States: 2016 to 2060
Source: PubMed Central journal article supplement (PMC10853249; doi:10.1038/s41514-024-00136-6), 2024-02-08
Supplement: 41514_2024_136_MOESM1_ESM.pdf [file 41514_2024_136_MOESM1_ESM.pdf]

## Supplementary Information

### Supplementary Methods

#### Formal cost: nursing home care

We use the Genworth Long Term Cost of Care Study<sup>1</sup> for state-level data on nightly private nursing home and hourly home health aide rates combined with the 2010 United States census data made available from the 2019 IPUMS National Historical Geographic Information System<sup>2</sup> to calculate population-weighted region-level data.

Following the methodology used in Hurd et al. (2013)<sup>3</sup>, we used the self-reported metric of number of nights spent in a nursing home over the last two years reported in the Health and Retirement Survey (HRS) data and divided the number in half to get the annual number of nursing home nights for that respondent. Total average annual nursing home spending over this period was then computed by multiplying the number of nights in a nursing home with an estimate of the daily rate in the private market for respondents reporting private health insurance. Medicaid rates were used for respondents reporting Medicaid insurance.

As Hurd et al. (2013)<sup>3</sup> and Lima et al. (2018)<sup>4</sup> have noted, HRS may underestimate the time spent by respondents in nursing homes. Similar to the analysis of Hurd et al. (2013)<sup>3</sup>, we compared the nursing home occupancy rates and estimated number of nights spent by HRS 2010-2016 respondents to estimates from the 2010 U.S. Census and Centers for Medicare & Medicaid Services data on nursing homes. According to the 2010 Census data, 3.1% of the population aged 65 and older lived in a skilled nursing facility.<sup>5</sup> In comparison, 1.5% of the population aged 65 or older and 3.9% of population aged 70 years or older in the 2010 wave of the HRS sample reported living in nursing homes.

When comparing by age groups, in the 2010 Census, 0.9%, 3.2%, 10.4%, and 24.7% of those 65 to 74 years old, 75 to 84 years old, 85 to 94 years old, and 95 years and older, respectively, lived in nursing homes. In the 2010 wave of the HRS, 0.4%, 1.5%, 5.3%, and 11.9% of those 65 to 74 years old, 75 to 84 years old, 85 to 94 years old, and 95 years and older, respectively, lived in nursing homes.

In 2010, the number of certified beds per 1,000 people aged 65 and older was 41.2 and the occupancy rate was 83.1%,<sup>6</sup> indicating that 34.2 beds per 1,000 were occupied on average per day (or 0.0342 per person). Over a year, those 65 and older spent 12.5 days ( $0.0342 \times 365$  days) on average in a nursing home. In the 2010 wave of HRS, respondents aged 65 and older spent on average 6.4 nights in a nursing home during the previous year (12.7 days in the previous two years). In sensitivity analysis, we considered alternative nursing home costs that accounted for this difference (adjusted upward by a factor of 1.95). Supplementary Table 1 presents the alternative estimates of per patient care costs, which are used in our future projections of aggregate costs.

**Supplementary Table 1: Per patient annual cost of ADRDs formal care in the United States (2020 US\$)**

|                                                                                                                      | <b>Base case estimates</b> | <b>Adjusted estimates (higher nursing home cost)</b> | <b>Estimates for the subsample of non-zero costs</b> |
|----------------------------------------------------------------------------------------------------------------------|----------------------------|------------------------------------------------------|------------------------------------------------------|
| <b>Out-of-pocket:</b>                                                                                                |                            |                                                      |                                                      |
| Home health care                                                                                                     | 185                        | 185                                                  | 239                                                  |
| Nursing home                                                                                                         | 7,203                      | 14,046                                               | 18,298                                               |
| Total (A)                                                                                                            | 7,943                      | 14,786                                               | 9,945                                                |
| <b>Medicare spending:</b>                                                                                            |                            |                                                      |                                                      |
| Home health care agencies                                                                                            | 964                        | 964                                                  | 4,096                                                |
| Nursing home                                                                                                         | 1,505                      | 2,935                                                | 2,369                                                |
| Total (B)                                                                                                            | 4,365                      | 5,795                                                | 11,430                                               |
| <b>Formal home care:</b>                                                                                             |                            |                                                      |                                                      |
| Total                                                                                                                | 7,220                      | 7,220                                                | 30,675                                               |
| Less: Medicare and OOP                                                                                               | 1,149                      | 1,149                                                | 4,335                                                |
| Net total (C)                                                                                                        | 6,071                      | 6,071                                                | 26,340                                               |
| <b>Nursing home care:</b>                                                                                            |                            |                                                      |                                                      |
| Total                                                                                                                | 18,406                     | 35,892                                               | 28,974                                               |
| Less: Medicare and OOP                                                                                               | 8,708                      | 16,981                                               | 20,667                                               |
| Net total (D)                                                                                                        | 9,698                      | 18,911                                               | 8,307                                                |
| <b>Total care purchased in the marketplace (A+B+C+D)</b>                                                             | <b>28,078</b>              | <b>45,563</b>                                        | <b>56,022</b>                                        |
| <b>Informal care: replacement cost (E)</b>                                                                           | <b>36,667</b>              | <b>36,667</b>                                        | <b>36,667</b>                                        |
| <b>Total care purchased in the marketplace plus caregiving time valued according to replacement cost (A+B+C+D+E)</b> | <b>64,745</b>              | <b>82,230</b>                                        | <b>92,689</b>                                        |
| <b>Informal care: Foregone wage cost (F)</b>                                                                         | <b>15,792</b>              | <b>15,792</b>                                        | <b>15,792</b>                                        |
| <b>Total care purchased in the marketplace plus caregiving time valued at foregone wage cost (A+B+C+D+F)</b>         | <b>43,869</b>              | <b>61,355</b>                                        | <b>71,813</b>                                        |

**Note:** Adjusted estimates in the second column represent base case point estimates (manuscript Table 1), of which out-of-pocket, Medicare spending, and total spending for nursing home care were adjusted upward by a factor of 1.95. Non-zero cost estimates presented in the third column exclude individuals with zero costs, separately for each cost category. These estimates are from the base case, i.e., nursing home costs are not adjusted upwards. OOP = out of pocket.

## Informal cost of care

Informal care is care provided by a person not affiliated with an agency. We use two approaches to estimate the informal cost of caregiving: replacement cost and foregone wages.

The replacement cost method allows us to estimate the cost of replacing an informal caregiver—usually a family member—with a professional caregiver for the same number of hours.

The foregone wage approach estimates the opportunity cost of being a helper to an individual with ADRDs where the alternative is earning a market wage. The foregone wage method calculates the cost as hours spent by individual  $z$  helping individual  $i$  multiplied by the market wage that individual  $z$  could have earned.

### *Caregiver hours*

We use data on caregiver hours from HRS 2010–2016. We calculate the total number of caregiver hours per respondent; some HRS respondents receive help from multiple individuals, and some individuals help multiple respondents. We focus only on individuals, and drop from our data institutions, organizations, and professional helpers. For each respondent who received help, we extracted the number of hours per year.

Hours spent helping for caregivers who helped less than once per week were not collected, and values for these observations were imputed in each year based on reported caregiver characteristics: sex, relationship to respondent, and number of days per week or month of care, in line with Hurd et al. (2013). For missing values following the imputation, we used linear interpolation to assign yearly hours to individuals who had reported data only in some survey years. Hurd et al. also use place of residence for the imputation. However, in our data residence state or city were hard to come by and only existed for a minority of observations at the household level of the respondent (that is, not the helper). Where no data on hours spent on caregiving (measured in days per week, days per month, or every day in a month) were available, imputation was not possible. One of these three variables is needed for the imputation.

The maximum number of hours per day dedicated to helping in our data day is 24. However, a limit of 16 hours per day was imposed on caregivers, to allow for sleep, similar to Hurd et al. (2013). The hours are reported as hours per day, and number of days are reported as either

- Days per week,
- Days per month, or
- Every day (reported monthly).

We calculate the yearly number of hours:

$$\text{Helper hours}_{yi} = (\text{hours}_{di} * \#\text{days}_{mi}) * 12$$

Or

$$\text{Helper hours}_{yi} = (\text{hours}_{di} * \#\text{days}_{wi}) * 52.1429$$

Or

$$\text{Helper hours}_{yi} = (\text{hours}_{di} * 30.42) * 12$$

The last equation applies when respondents report helping every day.

The total number of helper hours for individual  $i$  in year  $y$  is the number of days per month  $m$ , multiplied by the number of hours per day  $d$  that individual  $i$  receives help, and finally multiplied by 12 months.

**Supplementary Table 2: Hourly wages from CPS**

| <b>Hourly wages by age (CPS 2017)</b>                                                                                                                                                                                        |             |                           |             |             |
|------------------------------------------------------------------------------------------------------------------------------------------------------------------------------------------------------------------------------|-------------|---------------------------|-------------|-------------|
|                                                                                                                                                                                                                              | <b>Mean</b> | <b>Standard deviation</b> | <b>Min.</b> | <b>Max.</b> |
| <b>Age 18–34</b>                                                                                                                                                                                                             |             |                           |             |             |
| Hourly wage                                                                                                                                                                                                                  | 11.54       | 4.48                      | 3.87        | 28.20       |
| <i>in 2020 dollars</i>                                                                                                                                                                                                       | 12.19       | 4.73                      | 4.09        | 29.78       |
| <i>Adjusted by LFPR</i>                                                                                                                                                                                                      | 9.14        | 4.59                      | 1.84        | 26.42       |
| <b>Age 35–44</b>                                                                                                                                                                                                             |             |                           |             |             |
| Hourly wage                                                                                                                                                                                                                  | 20.19       | 9.58                      | 6.57        | 52.20       |
| <i>in 2020 dollars</i>                                                                                                                                                                                                       | 21.32       | 10.11                     | 6.94        | 55.12       |
| <i>Adjusted by LFPR</i>                                                                                                                                                                                                      | 17.42       | 10.17                     | 3.51        | 52.48       |
| <b>Age 45–54</b>                                                                                                                                                                                                             |             |                           |             |             |
| Hourly wage                                                                                                                                                                                                                  | 22.07       | 10.81                     | 7.49        | 58.51       |
| <i>in 2020 dollars</i>                                                                                                                                                                                                       | 23.30       | 11.42                     | 7.91        | 61.79       |
| <i>Adjusted by LFPR</i>                                                                                                                                                                                                      | 18.73       | 11.32                     | 4.13        | 57.70       |
| <b>Age 55–64</b>                                                                                                                                                                                                             |             |                           |             |             |
| Hourly wage                                                                                                                                                                                                                  | 22.97       | 11.81                     | 6.93        | 57.86       |
| <i>in 2020 dollars</i>                                                                                                                                                                                                       | 24.26       | 12.48                     | 7.31        | 61.10       |
| <i>Adjusted by LFPR</i>                                                                                                                                                                                                      | 16.12       | 10.81                     | 2.81        | 49.40       |
| <b>Age 75+</b>                                                                                                                                                                                                               |             |                           |             |             |
| Hourly wage                                                                                                                                                                                                                  | 14.25       | 6.62                      | 7.48        | 35.12       |
| <i>in 2020 dollars</i>                                                                                                                                                                                                       | 15.05       | 6.99                      | 7.90        | 37.09       |
| <i>Adjusted by LFPR</i>                                                                                                                                                                                                      | 1.43        | 1.47                      | 0.22        | 6.21        |
| <b>Total</b>                                                                                                                                                                                                                 |             |                           |             |             |
| Hourly wage                                                                                                                                                                                                                  | 18.24       | 10.22                     | 3.87        | 58.51       |
| <i>in 2020 dollars</i>                                                                                                                                                                                                       | 19.26       | 10.79                     | 4.09        | 61.79       |
| <i>Adjusted by LFPR</i>                                                                                                                                                                                                      | 11.08       | 10.96                     | 0.22        | 57.70       |
| <b>Note:</b> Wage data come from the CPS and are from 2017. Data are first adjusted to 2020 dollars using the CPI and then by the labor force participation rate (LFPR) in each demographic group (age, education, and sex). |             |                           |             |             |

**Supplementary Table 3: Additional breakdowns of hourly wages**

| <b>Hourly wages by age (CPS 2017)</b> |                       |            |                    |                        |                         |
|---------------------------------------|-----------------------|------------|--------------------|------------------------|-------------------------|
| <i>Age</i>                            | <i>Education</i>      | <i>Sex</i> | <i>Hourly wage</i> | <i>In 2020 dollars</i> | <i>Adjusted by LFPR</i> |
| 18–34                                 | Less than high school | Men        | 8.2                | 8.6                    | 5.3                     |
|                                       |                       | Women      | 3.9                | 4.1                    | 1.8                     |
|                                       | High school graduate  | Men        | 14.2               | 15.0                   | 12.3                    |
|                                       |                       | Women      | 7.8                | 8.3                    | 5.5                     |
|                                       | Some college          | Men        | 14.7               | 15.5                   | 11.7                    |
|                                       |                       | Women      | 10.3               | 10.8                   | 7.6                     |
|                                       | College graduate      | Men        | 28.2               | 29.8                   | 26.4                    |
|                                       |                       | Women      | 19.8               | 20.9                   | 17.4                    |
| 35–44                                 | Less than high school | Men        | 15.2               | 16.1                   | 13.4                    |
|                                       |                       | Women      | 6.6                | 6.9                    | 3.5                     |
|                                       | High school graduate  | Men        | 24.4               | 25.8                   | 22.5                    |
|                                       |                       | Women      | 12.3               | 13.0                   | 8.7                     |
|                                       | Some college          | Men        | 30.4               | 32.1                   | 29.0                    |
|                                       |                       | Women      | 16.6               | 17.5                   | 13.6                    |
|                                       | College graduate      | Men        | 52.2               | 55.1                   | 52.5                    |
|                                       |                       | Women      | 32.3               | 34.1                   | 28.4                    |
| 45–54                                 | Less than high school | Men        | 15.5               | 16.4                   | 12.0                    |
|                                       |                       | Women      | 7.5                | 7.9                    | 4.1                     |
|                                       | High school graduate  | Men        | 23.7               | 25.1                   | 20.7                    |
|                                       |                       | Women      | 13.5               | 14.3                   | 9.6                     |
|                                       | Some college          | Men        | 31.6               | 33.3                   | 28.9                    |
|                                       |                       | Women      | 18.5               | 19.5                   | 14.9                    |
|                                       | College graduate      | Men        | 58.5               | 61.8                   | 57.7                    |
|                                       |                       | Women      | 34.2               | 36.1                   | 30.5                    |
| 55–64                                 | Less than high school | Men        | 13.8               | 14.6                   | 8.3                     |
|                                       |                       | Women      | 6.9                | 7.3                    | 2.8                     |
|                                       | High school graduate  | Men        | 24.9               | 26.3                   | 17.6                    |
|                                       |                       | Women      | 13.7               | 14.5                   | 7.9                     |
|                                       | Some college          | Men        | 28.7               | 30.3                   | 20.7                    |
|                                       |                       | Women      | 17.6               | 18.6                   | 11.3                    |
|                                       | College graduate      | Men        | 57.9               | 61.1                   | 49.4                    |
|                                       |                       | Women      | 32.8               | 34.6                   | 24.2                    |
| 65–74                                 | Less than high school | Men        | 12.8               | 13.5                   | 2.9                     |
|                                       |                       | Women      | 7.2                | 7.6                    | 0.9                     |
|                                       | High school graduate  | Men        | 18.2               | 19.2                   | 4.8                     |
|                                       |                       | Women      | 11.3               | 11.9                   | 2.3                     |
|                                       | Some college          | Men        | 25.0               | 26.4                   | 8.3                     |
|                                       |                       | Women      | 15.3               | 16.1                   | 3.9                     |
|                                       | College graduate      | Men        | 44.8               | 47.4                   | 20.2                    |
|                                       |                       | Women      | 25.3               | 26.7                   | 8.3                     |

|     |                       |       |      |      |     |
|-----|-----------------------|-------|------|------|-----|
| 75+ | Less than high school | Men   | 11.8 | 12.5 | 1.0 |
|     |                       | Women | 7.5  | 7.9  | 0.2 |
|     | High school graduate  | Men   | 16.0 | 16.9 | 1.7 |
|     |                       | Women | 10.4 | 11.0 | 0.6 |
|     | Some college          | Men   | 19.9 | 21.0 | 3.0 |
|     |                       | Women | 13.8 | 14.6 | 1.2 |
|     | College graduate      | Men   | 35.1 | 37.1 | 6.2 |
|     |                       | Women | 20.7 | 21.8 | 2.6 |

**Note:** Wage data are from the CPS and are from 2017. Data are adjusted first to 2020 dollars using the CPI, and then by the labor force participation rate (LFPR) in each demographic group (age, education, and sex).

### Foregone wages: wage imputations

Wage imputations were made by matching the average wage in the Current Population Survey 2017 (CPS) among workers in the same demographic group (based on age, sex, and education), as presented in Supplementary Tables 2 and 3. Hourly wage rates were adjusted to 2020 dollars using the Consumer Price Index (CPI). In line with Hurd et al., we multiply the average wage by the labor force participation rate in the same demographic group to account for caregivers who might not work. The labor force participation rate by age ranges from approximately 72% in the youngest age group to 8% among those aged 75 and over.

#### *Demographic characteristics*

We observe caregiver age, sex, and education in the HRS data, and we use these characteristics to assign helpers a market wage. We divide available education data into four groups: less than high school, high school graduate or GED, some college, and college graduate.

We also merge education data from the HRS Tracker file, which yields a few thousand additional matches across the years. The education groups are slightly different in this version of the data. We match the available categories in the tracker data to our preferred groups in the following way (Supplementary Table 4):

#### **Supplementary Table 4: Education categories**

| <b>Education categories</b> | <b>Tracker file data</b>   |
|-----------------------------|----------------------------|
| Less than high school       | No degree                  |
| High school graduate        | High school or GED         |
| Some college                | Two-year college degree    |
| College graduate            | Four-year degree or higher |
| Coded as missing            | Unknown/some college       |

If education data are available in multiple data sets, we set education equal to the highest obtained degree.

Age is divided into the following age groups, 18–34, 35–44, 45–54, 55–64, 65–74, and 75+.

*Imputations*

For any missing observation of age, sex, or education, we attempt cross-matching across survey waves. If values are still missing, we impute the demographic characteristics of respondents as follows:

When only education is missing, we match the education distribution of the caregivers with nonmissing education conditional on age and sex of caregivers with nonmissing values.

For a third of the caregivers, sex was missing, and we assigned a value corresponding to their relationship to the respondent. Sister or daughter would be assigned to female, father or uncle to male, and so on. Finally, any remaining missing observations were assumed to be female, in line with Hurd et al. (2013).

We use the same approach to age imputations as Hurd et al. (2013) and assume that one generation corresponds to 25 years (Supplementary Table 5). Helper relationships include in-laws, other children, and other individuals or relatives. Age has not been imputed when the helper relationship was categorized in the HRS as “Unknown” or “Not a sibling.”

If age and education are *both* still missing after this, observations are assigned the median age and education from the survey in year 2000: 57 years old and high school graduate.

**Supplementary Table 5: Age imputations for helpers in HRS**

| Relationship to respondent                                                                   | Age imputation based on respondent age |
|----------------------------------------------------------------------------------------------|----------------------------------------|
| Grandchild                                                                                   | -50 years                              |
| Child, stepchild, daughter- and son-in-law, other child, other respondent, or other relative | -25 years                              |
| Spouse, ex-spouse, late spouse, sibling, brother- and sister-in-law                          | Same age                               |
| Parent or in-laws                                                                            | +25 years                              |

## Supplementary References

- 1 Genworth. Cost of Long Term Care by State. 2022. <https://www.genworth.com/aging-and-you/finances/cost-of-care.html> (accessed April 22, 2022).
- 2 IPUMS. National Historical Geographic Information System (NHGIS). 2019. <https://www.nhgis.org/> (accessed Oct 3, 2023).
- 3 Hurd MD, Martorell P, Delavande A, Mullen KJ, Langa KM. Monetary Costs of Dementia in the United States. *N Engl J Med* 2013; **368**: 1326–34.
- 4 Lima JC, Ogarek J, Mor V. Untapped Potential – Using the HRS-Medicare Linked Files to Study the Changing Nursing Home Population. *Med Care* 2018; **56**: 216–9.
- 5 US Census Bureau. The Older Population: 2010. US Department of Commerce, 2011.
- 6 Centers for Medicare & Medicaid Services. Nursing Home Data Compendium 2015. Washington DC, 2015.
